# Supplementary material for: Acceptability, Feasibility, and Initial Efficacy of Virtual Reality as a Home-Based Exercise Modality for Young Adults
Source: Research Square preprint supplement (doi:10.21203/rs.3.rs-5486191/v1), 2025-10-26
Supplement: Supplementary file 1 [file 9431f14ded318045348f17ab.docx]

**Supplementary Materials**

### **Supplement 1: Semi – Structured Interview Guide**

This is a semi-structured interview guide for my reference. Participants do not need to answer every question in detail. The guide serves as a framework to explore relevant topics during the interview.

### Background and Physical Activity:

1. Can you describe your typical exercise routine?
2. Are there specific challenges or barriers you face when trying to exercise at home?
3. What factors motivate or demotivate you to engage in at-home exercise?
4. How do you perceive the convenience of incorporating VR-based exercise into your daily life?

### Motivation to Try VR Exercise:

1. What initially motivated you to try VR-based exercise?
2. Can you describe a specific moment or instance when you felt particularly motivated or challenged during VR-based exercise at home?

### Enjoyment of VR Exercise:

1. Tell me about your experiences using VR for exercise. What aspects did you enjoy the most?
2. How does the virtual environment contribute to your enjoyment of exercise?
3. Did the virtual environment hinder you at all? / Any elements of virtual environment you disliked.
4. Are there specific features or elements in VR exercise that you find particularly enjoyable or motivating?
5. What do you think makes VR-based exercise more enjoyable than other forms of physical activity?
6. Can you compare the enjoyment of VR-based exercise with traditional forms of exercise you may have tried?
7. Have you noticed any differences in your motivation levels when using VR compared to other exercise methods?

### Challenges and Barriers:

1. What challenges have you encountered when trying to incorporate VR-based exercise into your daily life?
2. Have there been any barriers or difficulties you've faced in maintaining a regular VR exercise routine?

### Social Aspects of VR Exercise:

1. Can you share your experiences regarding the social aspects of VR-based exercise?

Have you noticed differences (motivation, mood or happiness) when exercising alone versus with others in VR?

### Benefits and Changes in Well-being:

1. In your opinion, what are the main benefits of using VR for exercise, particularly in terms of your well-being?
2. How do you perceive your overall well-being (mood, stress, mental health) before and after engaging in VR-based exercise?
3. Have you noticed any specific changes in your well-being since incorporating VR exercise into your daily routine?

### Overall Reflections:

1. How do you think incorporating VR-based exercise into your daily life has influenced your overall life/ well-being?
2. Is there anything else you would like to add about your experiences with VR-based exercise?

**Supplement 2: Descriptive Statistics for Completion % Week 1-8**

| Week | | N | | Mean | | SD | | SE | | Coefficient of variation | |
| --- | --- | --- | --- | --- | --- | --- | --- | --- | --- | --- | --- |
| 1 |  | 20 |  | 87.500 |  | 26.283 |  | 5.877 |  | 0.300 |  |
| 2 |  | 20 |  | 90.000 |  | 18.848 |  | 4.215 |  | 0.209 |  |
| 3 |  | 20 |  | 90.000 |  | 18.848 |  | 4.215 |  | 0.209 |  |
| 4 |  | 20 |  | 72.500 |  | 37.081 |  | 8.292 |  | 0.511 |  |
| 5 |  | 20 |  | 65.000 |  | 33.834 |  | 7.566 |  | 0.521 |  |
| 6 |  | 20 |  | 41.250 |  | 44.629 |  | 9.979 |  | 1.082 |  |
| 7 |  | 20 |  | 41.250 |  | 45.360 |  | 10.143 |  | 1.100 |  |
| 8 |  | 20 |  | 40.000 |  | 44.721 |  | 10.000 |  | 1.118 |  |
|  | | | | | | | | | | | |

**Table S1:** Week by week descriptive statistics for completion of sessions

**Supplement 3: Full Descriptive Statistics and Effect Sizes for Initial Efficacy**

| **Table S2.** Pre-Mid Descriptives | | | | | | | | | | | |
| --- | --- | --- | --- | --- | --- | --- | --- | --- | --- | --- | --- |
|  | | N | | Mean | | SD | | SE | | Coefficient of variation | |
| PAI_Mid |  | 20 |  | 3.700 |  | 0.657 |  | 0.147 |  | 0.178 |  |
| PAI_Pre |  | 20 |  | 3.650 |  | 0.671 |  | 0.150 |  | 0.184 |  |
| LTE_Mid |  | 20 |  | 2.800 |  | 0.410 |  | 0.092 |  | 0.147 |  |
| LTE_Pre |  | 20 |  | 2.450 |  | 0.826 |  | 0.185 |  | 0.337 |  |
| AtE_Mid |  | 20 |  | 4.960 |  | 0.560 |  | 0.125 |  | 0.113 |  |
| AtE_Pre |  | 20 |  | 5.080 |  | 0.541 |  | 0.121 |  | 0.106 |  |
| ESE_Mid |  | 20 |  | 4.464 |  | 1.102 |  | 0.246 |  | 0.247 |  |
| ESE_Pre |  | 20 |  | 4.229 |  | 1.000 |  | 0.224 |  | 0.236 |  |
| D_Mid |  | 20 |  | 5.700 |  | 5.283 |  | 1.181 |  | 0.927 |  |
| D_Pre |  | 20 |  | 7.400 |  | 6.778 |  | 1.516 |  | 0.916 |  |
| A_Mid |  | 20 |  | 7.300 |  | 6.027 |  | 1.348 |  | 0.826 |  |
| A_Pre |  | 20 |  | 7.600 |  | 5.295 |  | 1.184 |  | 0.697 |  |
| S_Mid |  | 20 |  | 9.600 |  | 6.142 |  | 1.373 |  | 0.640 |  |
| S_Pre |  | 20 |  | 11.500 |  | 7.674 |  | 1.716 |  | 0.667 |  |
| V02_Mid |  | 20 |  | 130.250 |  | 22.316 |  | 4.990 |  | 0.171 |  |
| V02_Pre |  | 20 |  | 120.350 |  | 29.796 |  | 6.663 |  | 0.248 |  |
| VT1_Mid |  | 20 |  | 45.868 |  | 9.569 |  | 2.140 |  | 0.209 |  |
| VT1_Pre |  | 20 |  | 46.952 |  | 8.173 |  | 1.828 |  | 0.174 |  |
|  | | | | | | | | | | | |

**Table S3.** Pre-Mid Effect Sizes

|  | | | | | | | | | | | | | | | | | | | |
| --- | --- | --- | --- | --- | --- | --- | --- | --- | --- | --- | --- | --- | --- | --- | --- | --- | --- | --- | --- |
|  | | | | | | | | | | | | | | | | 95% CI for Cohen's d | | | |
| Measure 1 | |  | | Measure 2 | | t | | df | | p | | Cohen's d | | SE Cohen's d | | Lower | | Upper | |
| PAI_Mid |  | - |  | PAI_Pre |  | 0.326 |  | 19 |  | 0.748 |  | 0.073 |  | 0.231 |  | -0.367 |  | 0.511 |  |
| LTE_Mid |  | - |  | LTE_Pre |  | 2.666 |  | 19 |  | 0.015 |  | 0.596 |  | 0.173 |  | 0.113 |  | 1.066 |  |
| AtE_Mid |  | - |  | AtE_Pre |  | -0.794 |  | 19 |  | 0.437 |  | -0.178 |  | 0.276 |  | -0.617 |  | 0.266 |  |
| ESE_Mid |  | - |  | ESE_Pre |  | 1.244 |  | 19 |  | 0.229 |  | 0.278 |  | 0.183 |  | -0.172 |  | 0.722 |  |
| D_Mid |  | - |  | D_Pre |  | -1.562 |  | 19 |  | 0.135 |  | -0.349 |  | 0.178 |  | -0.797 |  | 0.107 |  |
| A_Mid |  | - |  | A_Pre |  | -0.204 |  | 19 |  | 0.840 |  | -0.046 |  | 0.258 |  | -0.484 |  | 0.393 |  |
| S_Mid |  | - |  | S_Pre |  | -1.582 |  | 19 |  | 0.130 |  | -0.354 |  | 0.173 |  | -0.802 |  | 0.103 |  |
| V02_Mid |  | - |  | V02_Pre |  | 2.545 |  | 19 |  | 0.020 |  | 0.569 |  | 0.147 |  | 0.089 |  | 1.036 |  |
| VT1_Mid |  | - |  | VT1_Pre |  | -0.557 |  | 19 |  | 0.584 |  | -0.125 |  | 0.218 |  | -0.563 |  | 0.317 |  |
|  | | | | | | | | | | | | | | | | | | | |
| Note.  Student's t-test. | | | | | | | | | | | | | | | | | | | |

| **Table S4.** Mid-Post Descriptives | | | | | | | | | | | |
| --- | --- | --- | --- | --- | --- | --- | --- | --- | --- | --- | --- |
|  | | N | | Mean | | SD | | SE | | Coefficient of variation | |
| PAI_Post |  | 17 |  | 3.529 |  | 0.717 |  | 0.174 |  | 0.203 |  |
| PAI_Mid |  | 20 |  | 3.700 |  | 0.657 |  | 0.147 |  | 0.178 |  |
| LTE_Post |  | 17 |  | 2.941 |  | 0.243 |  | 0.059 |  | 0.082 |  |
| LTE_Mid |  | 20 |  | 2.800 |  | 0.410 |  | 0.092 |  | 0.147 |  |
| AtE_Post |  | 17 |  | 5.012 |  | 0.740 |  | 0.179 |  | 0.148 |  |
| AtE_Mid |  | 20 |  | 4.960 |  | 0.560 |  | 0.125 |  | 0.113 |  |
| ESE_Post |  | 17 |  | 4.504 |  | 0.926 |  | 0.225 |  | 0.206 |  |
| ESE_Mid |  | 20 |  | 4.464 |  | 1.102 |  | 0.246 |  | 0.247 |  |
| D_Post |  | 17 |  | 4.235 |  | 4.352 |  | 1.056 |  | 1.028 |  |
| D_Mid |  | 20 |  | 5.700 |  | 5.283 |  | 1.181 |  | 0.927 |  |
| A_Post |  | 17 |  | 4.941 |  | 6.088 |  | 1.476 |  | 1.232 |  |
| A_Mid |  | 20 |  | 7.300 |  | 6.027 |  | 1.348 |  | 0.826 |  |
| S_Mid |  | 20 |  | 9.600 |  | 6.142 |  | 1.373 |  | 0.640 |  |
| S_Post |  | 17 |  | 9.294 |  | 6.854 |  | 1.662 |  | 0.737 |  |
| V02_Post |  | 14 |  | 127.643 |  | 27.083 |  | 7.238 |  | 0.212 |  |
| V02_Mid |  | 20 |  | 130.250 |  | 22.316 |  | 4.990 |  | 0.171 |  |
| VT1_Post |  | 14 |  | 46.976 |  | 8.217 |  | 2.196 |  | 0.175 |  |
| VT1_Mid |  | 20 |  | 45.868 |  | 9.569 |  | 2.140 |  | 0.209 |  |
|  | | | | | | | | | | | |

**Table S5**. Mid-Post Effect Sizes

|  | | | | | | | | | | | | | | | | | | | |
| --- | --- | --- | --- | --- | --- | --- | --- | --- | --- | --- | --- | --- | --- | --- | --- | --- | --- | --- | --- |
|  | | | | | | | | | | | | | | | | 95% CI for Cohen's d | | | |
| Measure 1 | |  | | Measure 2 | | t | | df | | p | | Cohen's d | | SE Cohen's d | | Lower | | Upper | |
| PAI_Post |  | - |  | PAI_Mid |  | -1.000 |  | 16 |  | 0.332 |  | -0.243 |  | 0.255 |  | -0.722 |  | 0.244 |  |
| LTE_Post |  | - |  | LTE_Mid |  | 1.461 |  | 16 |  | 0.163 |  | 0.354 |  | 0.240 |  | -0.142 |  | 0.840 |  |
| AtE_Post |  | - |  | AtE_Mid |  | 0.400 |  | 16 |  | 0.694 |  | 0.097 |  | 0.315 |  | -0.381 |  | 0.572 |  |
| ESE_Post |  | - |  | ESE_Mid |  | 0.120 |  | 16 |  | 0.906 |  | 0.029 |  | 0.209 |  | -0.447 |  | 0.504 |  |
| D_Post |  | - |  | D_Mid |  | -0.817 |  | 16 |  | 0.426 |  | -0.198 |  | 0.253 |  | -0.675 |  | 0.285 |  |
| A_Post |  | - |  | A_Mid |  | -0.915 |  | 16 |  | 0.374 |  | -0.222 |  | 0.243 |  | -0.700 |  | 0.263 |  |
| S_Mid |  | - |  | S_Post |  | -0.792 |  | 16 |  | 0.440 |  | -0.192 |  | 0.240 |  | -0.669 |  | 0.291 |  |
| V02_Post |  | - |  | V02_Mid |  | -0.588 |  | 13 |  | 0.566 |  | -0.157 |  | 0.110 |  | -0.682 |  | 0.373 |  |
| VT1_Post |  | - |  | VT1_Mid |  | 0.197 |  | 13 |  | 0.847 |  | 0.053 |  | 0.275 |  | -0.473 |  | 0.576 |  |
|  | | | | | | | | | | | | | | | | | | | |
| Note.  Student's t-test. | | | | | | | | | | | | | | | | | | | |

| **Table S6.** Pre-Post Descriptives | | | | | | | | | | | |
| --- | --- | --- | --- | --- | --- | --- | --- | --- | --- | --- | --- |
|  | | N | | Mean | | SD | | SE | | Coefficient of variation | |
| PAI_Post |  | 17 |  | 3.529 |  | 0.717 |  | 0.174 |  | 0.203 |  |
| PAI_Pre |  | 20 |  | 3.650 |  | 0.671 |  | 0.150 |  | 0.184 |  |
| LTE_Post |  | 17 |  | 2.941 |  | 0.243 |  | 0.059 |  | 0.082 |  |
| LTE_Pre |  | 20 |  | 2.450 |  | 0.826 |  | 0.185 |  | 0.337 |  |
| AtE_Post |  | 17 |  | 5.012 |  | 0.740 |  | 0.179 |  | 0.148 |  |
| AtE_Pre |  | 20 |  | 5.080 |  | 0.541 |  | 0.121 |  | 0.106 |  |
| ESE_Post |  | 17 |  | 4.504 |  | 0.926 |  | 0.225 |  | 0.206 |  |
| ESE_Pre |  | 20 |  | 4.229 |  | 1.000 |  | 0.224 |  | 0.236 |  |
| D_Post |  | 17 |  | 4.235 |  | 4.352 |  | 1.056 |  | 1.028 |  |
| D_Pre |  | 20 |  | 7.400 |  | 6.778 |  | 1.516 |  | 0.916 |  |
| A_Post |  | 17 |  | 4.941 |  | 6.088 |  | 1.476 |  | 1.232 |  |
| A_Pre |  | 20 |  | 7.600 |  | 5.295 |  | 1.184 |  | 0.697 |  |
| S_Post |  | 17 |  | 9.294 |  | 6.854 |  | 1.662 |  | 0.737 |  |
| S_Pre |  | 20 |  | 11.500 |  | 7.674 |  | 1.716 |  | 0.667 |  |
| V02_Post |  | 14 |  | 127.643 |  | 27.083 |  | 7.238 |  | 0.212 |  |
| V02_Pre |  | 20 |  | 120.350 |  | 29.796 |  | 6.663 |  | 0.248 |  |
| VT1_Post |  | 14 |  | 46.976 |  | 8.217 |  | 2.196 |  | 0.175 |  |
| VT1_Pre |  | 20 |  | 46.952 |  | 8.173 |  | 1.828 |  | 0.174 |  |
|  | | | | | | | | | | | |

**Table S7.** Pre-Post Effect Sizes

|  | | | | | | | | | | | | | | | | | | | |
| --- | --- | --- | --- | --- | --- | --- | --- | --- | --- | --- | --- | --- | --- | --- | --- | --- | --- | --- | --- |
|  | | | | | | | | | | | | | | | | 95% CI for Cohen's d | | | |
| Measure 1 | |  | | Measure 2 | | t | | df | | p | | Cohen's d | | SE Cohen's d | | Lower | | Upper | |
| PAI_Post |  | - |  | PAI_Pre |  | -0.566 |  | 16 |  | 0.579 |  | -0.137 |  | 0.294 |  | -0.613 |  | 0.343 |  |
| LTE_Post |  | - |  | LTE_Pre |  | 2.704 |  | 16 |  | 0.016 |  | 0.656 |  | 0.274 |  | 0.122 |  | 1.174 |  |
| AtE_Post |  | - |  | AtE_Pre |  | 0.000 |  | 16 |  | 1.000 |  | 0.000 |  | 0.313 |  | -0.475 |  | 0.475 |  |
| ESE_Post |  | - |  | ESE_Pre |  | 1.680 |  | 16 |  | 0.112 |  | 0.407 |  | 0.254 |  | -0.094 |  | 0.897 |  |
| D_Post |  | - |  | D_Pre |  | -1.796 |  | 16 |  | 0.091 |  | -0.436 |  | 0.283 |  | -0.928 |  | 0.069 |  |
| A_Post |  | - |  | A_Pre |  | -2.194 |  | 16 |  | 0.043 |  | -0.532 |  | 0.245 |  | -1.034 |  | -0.016 |  |
| S_Post |  | - |  | S_Pre |  | -0.941 |  | 16 |  | 0.361 |  | -0.228 |  | 0.233 |  | -0.706 |  | 0.257 |  |
| V02_Post |  | - |  | V02_Pre |  | 1.813 |  | 13 |  | 0.093 |  | 0.484 |  | 0.133 |  | -0.079 |  | 1.032 |  |
| VT1_Post |  | - |  | VT1_Pre |  | 0.612 |  | 13 |  | 0.551 |  | 0.164 |  | 0.220 |  | -0.367 |  | 0.688 |  |
|  | | | | | | | | | | | | | | | | | | | |
| Note.  Student's t-test. | | | | | | | | | | | | | | | | | | | |
